# Supplementary material for: Association between cold spells and frailty among middle-aged and older adults in China: Evidence from a national longitudinal survey
Source: Research Square preprint supplement (doi:10.21203/rs.3.rs-8701131/v1), 2026-02-24
Supplement: Supplementary file 1 [file 0bd9b3812346f3565202cbb8.docx]

**Table S12** Association of cold spells with frailty by drinking status

| **Exposure** | **HR (95%CI)**  **Non-drinking** | **HR (95%CI)**  **Drinking** | ***p-*value** |
| --- | --- | --- | --- |
| CS1 (P7.5_2d) | 1.149 (1.105, 1.196) | 1.122 (1.041, 1.210) | **0.0429** |
| CS2 (P7.5_3d) | 1.152 (1.108, 1.198) | 1.127 (1.046, 1.215) | **0.0446** |
| CS3 (P7.5_4d) | 1.143 (1.103, 1.184) | 1.128 (1.053, 1.208) | 0.0664 |
| CS4 (P5_2d) | 1.134 (1.095, 1.174) | 1.120 (1.048, 1.197) | 0.106 |
| CS5 (P5_3d) | 1.128 (1.089, 1.168) | 1.108 (1.038, 1.184) | 0.0993 |
| CS6 (P5_4d) | 1.132 (1.093, 1.173) | 1.110 (1.038, 1.186) | 0.0909 |
| CS7 (P2.5_2d) | 1.147 (1.102, 1.193) | 1.133 (1.053, 1.220) | 0.124 |
| CS8 (P2.5_3d) | 1.143 (1.098, 1.190) | 1.133 (1.053, 1.220) | 0.158 |
| CS9 (P2.5_4d) | 1.146 (1.101, 1.194) | 1.139 (1.058, 1.226) | 0.180 |

CS data were natural-log-transformed after adding 1 (i.e., ln [x + 1]).

HR, hazard ratio; CI, confidence interval: CS, cold spell.

Adjusted for age, gender, marry, residence, education, region, BMI categories, sleep duration, drinking status, smoking status, heating fuels and cooking fuels.

P-value was calculated using interaction terms (cold spell×drinking status).
