# Supplementary material for: Association between cold spells and frailty among middle-aged and older adults in China: Evidence from a national longitudinal survey
Source: Research Square preprint supplement (doi:10.21203/rs.3.rs-8701131/v1), 2026-02-24
Supplement: Supplementary file 3 [file 20a03bdc15e83414054d60fd.docx]

**Table S16** Association of cold spells with frailty when employing multivariate imputation by chained equations

| **Exposure** | **HR (95%CI) a** | **HR (95%CI) b** | **HR (95%CI) c** | **HR (95%CI) d** |
| --- | --- | --- | --- | --- |
| CS1 (P7.5_2d) | 1.060  (1.041, 1.079) | 1.131  (1.099, 1.163) | 1.143  (1.111, 1.176) | 1.129  (1.098, 1.162) |
| CS2 (P7.5_3d) | 1.063  (1.044, 1.082) | 1.130  (1.099, 1.162) | 1.143  (1.112, 1.175) | 1.129  (1.098, 1.161) |
| CS3 (P7.5_4d) | 1.068  (1.049, 1.088) | 1.125  (1.097, 1.154) | 1.138  (1.110, 1.167) | 1.126  (1.097, 1.154) |
| CS4 (P5_2d) | 1.075  (1.054, 1.097) | 1.120  (1.093, 1.148) | 1.132  (1.104, 1.160) | 1.117  (1.090, 1.145) |
| CS5 (P5_3d) | 1.074  (1.053, 1.096) | 1.117  (1.090, 1.145) | 1.128  (1.101, 1.156) | 1.113  (1.086, 1.141) |
| CS6 (P5_4d) | 1.076  (1.054, 1.098) | 1.120  (1.092, 1.148) | 1.131  (1.104, 1.160) | 1.116  (1.089, 1.145) |
| CS7 (P2.5_2d) | 1.078  (1.053, 1.105) | 1.131  (1.100, 1.163) | 1.143  (1.112, 1.176) | 1.126  (1.095, 1.158) |
| CS8 (P2.5_3d) | 1.077  (1.051, 1.104) | 1.130  (1.099, 1.163) | 1.142  (1.110, 1.174) | 1.124  (1.093, 1.157) |
| CS9 (P2.5_4d) | 1.078  (1.051, 1.106) | 1.133  (1.101, 1.166) | 1.143  (1.111, 1.176) | 1.126  (1.094, 1.158) |

CS data were natural-log-transformed after adding 1 (i.e., ln [x + 1]).

HR, hazard ratio; CI, confidence interval: CS, cold spell.

a Model 1: unadjusted.

b Model 2: adjusted for age, gender, marry, residence, education and region.

c Model 3: adjusted for age, gender, marry, residence, education, region, BMI categories, sleep duration, drinking status, smoking status.

d Model 4: adjusted for age, gender, marry, residence, education, region, BMI categories, sleep duration, drinking status, smoking status, heating fuels and cooking fuels.
