# Supplementary material for: Association between cold spells and frailty among middle-aged and older adults in China: Evidence from a national longitudinal survey
Source: Research Square preprint supplement (doi:10.21203/rs.3.rs-8701131/v1), 2026-02-24
Supplement: Supplementary file 4 [file 2442568c1113ae187e6733b7.docx]

**Table S13** Association of cold spells with frailty by heating fuels

| **Exposure** | **HR (95%CI)**  **Solid** | **HR (95%CI)**  **Clean** | ***p-*value** |
| --- | --- | --- | --- |
| CS1 (P7.5_2d) | 1.173 (1.125, 1.223) | 1.094 (1.026, 1.165) | 0.0625 |
| CS2 (P7.5_3d) | 1.174 (1.127, 1.224) | 1.103 (1.037, 1.173) | 0.0776 |
| CS3 (P7.5_4d) | 1.159 (1.116, 1.203) | 1.110 (1.047, 1.177) | 0.125 |
| CS4 (P5_2d) | 1.146 (1.103, 1.190) | 1.112 (1.052, 1.176) | 0.247 |
| CS5 (P5_3d) | 1.135 (1.093, 1.178) | 1.111 (1.052, 1.174) | 0.358 |
| CS6 (P5_4d) | 1.141 (1.098, 1.185) | 1.111 (1.051, 1.174) | 0.284 |
| CS7 (P2.5_2d) | 1.158 (1.109, 1.210) | 1.130 (1.063, 1.200) | 0.294 |
| CS8 (P2.5_3d) | 1.159 (1.109, 1.211) | 1.123 (1.057, 1.193) | 0.222 |
| CS9 (P2.5_4d) | 1.163 (1.112, 1.215) | 1.125 (1.059, 1.196) | 0.217 |

CS data were natural-log-transformed after adding 1 (i.e., ln [x + 1]).

HR, hazard ratio; CI, confidence interval: CS, cold spell.

Adjusted for age, gender, marry, residence, education, region, BMI categories, sleep duration, drinking status, smoking status, heating fuels and cooking fuels.

P-value was calculated using interaction terms (cold spell×heating fuels).
