# Supplementary material for: Association between cold spells and frailty among middle-aged and older adults in China: Evidence from a national longitudinal survey
Source: Research Square preprint supplement (doi:10.21203/rs.3.rs-8701131/v1), 2026-02-24
Supplement: Supplementary file 5 [file 2e889a3bb21532410e5f2c36.docx]

**Table S14** Association of cold spells with frailty by smoking status

| **Exposure** | **HR (95%CI)**  **Non-smoking** | **HR (95%CI)**  **smoking** | ***p-*value** |
| --- | --- | --- | --- |
| CS1 (P7.5_2d) | 1.137 (1.094, 1.182) | 1.162 (1.065, 1.269) | 0.915 |
| CS2 (P7.5_3d) | 1.142 (1.099, 1.186) | 1.161 (1.066, 1.265) | 0.964 |
| CS3 (P7.5_4d) | 1.137 (1.099, 1.177) | 1.139 (1.055, 1.229) | 0.911 |
| CS4 (P5_2d) | 1.131 (1.092, 1.170) | 1.124 (1.044, 1.210) | 0.905 |
| CS5 (P5_3d) | 1.125 (1.087, 1.164) | 1.109 (1.031, 1.193) | 0.826 |
| CS6 (P5_4d) | 1.130 (1.091, 1.169) | 1.109 (1.030, 1.194) | 0.786 |
| CS7 (P2.5_2d) | 1.144 (1.100, 1.190) | 1.125 (1.038, 1.218) | 0.865 |
| CS8 (P2.5_3d) | 1.143 (1.099, 1.189) | 1.117 (1.031, 1.209) | 0.804 |
| CS9 (P2.5_4d) | 1.148 (1.103, 1.195) | 1.117 (1.032, 1.209) | 0.742 |

CS data were natural-log-transformed after adding 1 (i.e., ln [x + 1]).

HR, hazard ratio; CI, confidence interval: CS, cold spell.

Adjusted for age, gender, marry, residence, education, region, BMI categories, sleep duration, drinking status, smoking status, heating fuels and cooking fuels.

P-value was calculated using interaction terms (cold spell×smoking status).
