# Supplementary material for: Association between cold spells and frailty among middle-aged and older adults in China: Evidence from a national longitudinal survey
Source: Research Square preprint supplement (doi:10.21203/rs.3.rs-8701131/v1), 2026-02-24
Supplement: Supplementary file 6 [file 47d6e11c23901c0b7c9209ff.docx]

**Table S4** The descriptive analysis of cold spells and their natural-log-transformed values during the cohort period

| **Exposure** | | Minimum | Maximum | Mean | SD | Median | IQR (Q1, Q3) |
| --- | --- | --- | --- | --- | --- | --- | --- |
| 2012 | CS1 (P7.5_2d) | 0 | 146.00 | 20.83 | 39.04 | 0 | (0, 15.00) |
| Ln (CS1 (P7.5_2d) +1) | 0 | 4.99 | 1.26 | 1.86 | 0 | (0, 2.77) |
| CS2 (P7.5_3d) | 0 | 146.00 | 19.92 | 38.33 | 0 | (0, 11.25) |
| Ln (CS2 (P7.5_3d) +1) | 0 | 4.99 | 1.18 | 1.85 | 0 | (0, 2.50) |
| CS3 (P7.5_4d) | 0 | 143.00 | 18.94 | 37.20 | 0 | (0, 8.25) |
| Ln (CS3 (P7.5_4d) +1) | 0 | 4.97 | 1.12 | 1.83 | 0 | (0, 2.21) |
| CS4 (P5_2d) | 0 | 131.00 | 13.98 | 31.70 | 0 | (0, 0) |
| Ln (CS4 (P5_2d) +1) | 0 | 4.88 | 0.89 | 1.67 | 0 | (0, 0) |
| CS5 (P5_3d) | 0 | 129.00 | 13.33 | 30.68 | 0 | (0, 0) |
| Ln (CS5 (P5_3d) +1) | 0 | 4.87 | 0.87 | 1.64 | 0 | (0, 0) |
| CS6 (P5_4d) | 0 | 126.00 | 12.76 | 29.80 | 0 | (0, 0) |
| Ln (CS6 (P5_4d) +1) | 0 | 4.84 | 0.84 | 1.62 | 0 | (0, 0) |
| CS7 (P2.5_2d) | 0 | 115.00 | 7.54 | 22.11 | 0 | (0, 0) |
| Ln (CS7 (P2.5_2d) +1) | 0 | 4.75 | 0.60 | 1.34 | 0 | (0, 0) |
| CS8 (P2.5_3d) | 0 | 115.00 | 7.05 | 21.57 | 0 | (0, 0) |
| Ln (CS8 (P2.5_3d) +1) | 0 | 4.75 | 0.53 | 1.30 | 0 | (0, 0) |
| CS9 (P2.5_4d) | 0 | 115.00 | 6.71 | 20.98 | 0 | (0, 0) |
| Ln (CS9 (P2.5_4d) +1) | 0 | 4.75 | 0.51 | 1.27 | 0 | (0, 0) |
| 2014 | CS1 (P7.5_2d) | 0 | 130.00 | 19.20 | 34.78 | 0 | (0, 16.00) |
| Ln (CS1 (P7.5_2d) +1) | 0 | 4.88 | 1.39 | 1.77 | 0 | (0, 2.83) |
| CS2 (P7.5_3d) | 0 | 126.00 | 18.29 | 34.31 | 0 | (0, 10.75) |
| Ln (CS2 (P7.5_3d) +1) | 0 | 4.84 | 1.31 | 1.76 | 0 | (0, 2.46) |
| CS3 (P7.5_4d) | 0 | 126.00 | 17.15 | 33.91 | 0 | (0, 9.75) |
| Ln (CS3 (P7.5_4d) +1) | 0 | 4.84 | 1.11 | 1.78 | 0 | (0, 2.37) |
| CS4 (P5_2d) | 0 | 116.00 | 12.58 | 28.10 | 0 | (0, 1.50) |
| Ln (CS4 (P5_2d) +1) | 0 | 4.76 | 0.88 | 1.63 | 0 | (0, 0.82) |
| CS5 (P5_3d) | 0 | 112.00 | 11.80 | 27.32 | 0 | (0, 0) |
| Ln (CS5 (P5_3d) +1) | 0 | 4.73 | 0.81 | 1.60 | 0 | (0, 0) |
| CS6 (P5_4d) | 0 | 112.00 | 11.06 | 26.60 | 0 | (0, 0) |
| Ln (CS6 (P5_4d) +1) | 0 | 4.73 | 0.77 | 1.56 | 0 | (0, 0) |
| CS7 (P2.5_2d) | 0 | 100.00 | 6.92 | 21.01 | 0 | (0, 0) |
| Ln (CS7 (P2.5_2d) +1) | 0 | 4.62 | 0.56 | 1.29 | 0 | (0, 0) |
| CS8 (P2.5_3d) | 0 | 100.00 | 6.39 | 20.73 | 0 | (0, 0) |
| Ln (CS8 (P2.5_3d) +1) | 0 | 4.62 | 0.47 | 1.24 | 0 | (0, 0) |
| CS9 (P2.5_4d) | 0 | 100 | 5.77 | 19.77 | 0 | (0, 0) |
| Ln (CS9 (P2.5_4d) +1) | 0 | 4.62 | 0.40 | 1.19 | 0 | (0, 0) |
| 2017 | CS1 (P7.5_2d) | 0 | 143.00 | 19.83 | 38.57 | 0 | (0, 7.75) |
| Ln (CS1 (P7.5_2d) +1) | 0 | 4.97 | 1.15 | 1.84 | 0 | (0, 2.17) |
| CS2 (P7.5_3d) | 0 | 141.00 | 19.06 | 37.76 | 0 | (0, 5.50) |
| Ln (CS2 (P7.5_3d) +1) | 0 | 4.96 | 1.11 | 1.82 | 0 | (0, 1.86) |
| CS3 (P7.5_4d) | 0 | 138.00 | 18.25 | 38.97 | 0 | (0, 4.00) |
| Ln (CS3 (P7.5_4d) +1) | 0 | 4.93 | 1.05 | 1.81 | 0 | (0, 1.61) |
| CS4 (P5_2d) | 0 | 127.00 | 13.50 | 31.37 | 0 | (0, 0) |
| Ln (CS4 (P5_2d) +1) | 0 | 4.85 | 0.84 | 1.65 | 0 | (0, 0) |
| CS5 (P5_3d) | 0 | 123.00 | 12.75 | 30.58 | 0 | (0, 0) |
| Ln (CS5 (P5_3d) +1) | 0 | 4.82 | 0.81 | 1.62 | 0 | (0, 0) |
| CS6 (P5_4d) | 0 | 120.00 | 12.25 | 29.98 | 0 | (0, 0) |
| Ln (CS6 (P5_4d) +1) | 0 | 4.80 | 0.80 | 1.59 | 0 | (0, 0) |
| CS7 (P2.5_2d) | 0 | 111.00 | 7.94 | 24.18 | 0 | (0, 0) |
| Ln (CS7 (P2.5_2d) +1) | 0 | 4.72 | 0.55 | 1.34 | 0 | (0, 0) |
| CS8 (P2.5_3d) | 0 | 111.00 | 7.48 | 23.46 | 0 | (0, 0) |
| Ln (CS8 (P2.5_3d) +1) | 0 | 4.72 | 0.52 | 1.30 | 0 | (0, 0) |
| CS9 (P2.5_4d) | 0 | 111.00 | 7.13 | 23.18 | 0 | (0, 0) |
| Ln (CS9 (P2.5_4d) +1) | 0 | 4.72 | 0.47 | 1.27 | 0 | (0, 0) |

CS, Cold spell.
