# Supplementary material for: Association between cold spells and frailty among middle-aged and older adults in China: Evidence from a national longitudinal survey
Source: Research Square preprint supplement (doi:10.21203/rs.3.rs-8701131/v1), 2026-02-24
Supplement: Supplementary file 7 [file 70d4a9eb01283f7c7a74a9fa.docx]

**Table S7** Association of cold spells with frailty by age

| **Exposure** | **HR (95%CI)**  **age < 60** | **HR (95%CI)**  **age ≥ 60** | ***p-*value** |
| --- | --- | --- | --- |
| CS1 (P7.5_2d) | 1.120 (1.074, 1.168) | 1.191 (1.115, 1.272) | 0.316 |
| CS2 (P7.5_3d) | 1.124 (1.079, 1.171) | 1.192 (1.118, 1.271) | 0.310 |
| CS3 (P7.5_4d) | 1.117 (1.075, 1.159) | 1.183 (1.117, 1.253) | 0.221 |
| CS4 (P5_2d) | 1.104 (1.063, 1.147) | 1.178 (1.114, 1.245) | 0.128 |
| CS5 (P5_3d) | 1.095 (1.054, 1.137) | 1.173 (1.110, 1.239) | 0.095 |
| CS6 (P5_4d) | 1.097 (1.056, 1.140) | 1.179 (1.116, 1.246) | 0.083 |
| CS7 (P2.5_2d) | 1.101 (1.054, 1.151) | 1.213 (1.143, 1.287) | **0.031** |
| CS8 (P2.5_3d) | 1.102 (1.054, 1.152) | 1.202 (1.133, 1.275) | **0.049** |
| CS9 (P2.5_4d) | 1.102 (1.054, 1.153) | 1.211 (1.141, 1.284) | **0.035** |

CS data were natural-log-transformed after adding 1 (i.e., ln [x + 1]).

HR, hazard ratio; CI, confidence interval: CS, cold spell.

Adjusted for age, gender, marry, residence, education, region, BMI categories, sleep duration, drinking status, smoking status, heating fuels and cooking fuels.

P-value was calculated using interaction terms (cold spell×age).
