# Supplementary material for: Association between cold spells and frailty among middle-aged and older adults in China: Evidence from a national longitudinal survey
Source: Research Square preprint supplement (doi:10.21203/rs.3.rs-8701131/v1), 2026-02-24
Supplement: Supplementary file 8 [file 7de8803175bc43fe179e1466.docx]

**Table S10** Association of cold spells with frailty by residence

| **Exposure** | **HR (95%CI)**  **Urban** | **HR (95%CI)**  **Rural** | ***p-*value** |
| --- | --- | --- | --- |
| CS1 (P7.5_2d) | 1.113 (1.051, 1.179) | 1.157 (1.107, 1.21) | 0.306 |
| CS2 (P7.5_3d) | 1.116 (1.054, 1.180) | 1.161 (1.111, 1.212) | 0.345 |
| CS3 (P7.5_4d) | 1.108 (1.052, 1.167) | 1.153 (1.109, 1.200) | 0.472 |
| CS4 (P5_2d) | 1.106 (1.052, 1.162) | 1.143 (1.099, 1.190) | 0.670 |
| CS5 (P5_3d) | 1.109 (1.054, 1.165) | 1.129 (1.086, 1.175) | 0.480 |
| CS6 (P5_4d) | 1.113 (1.058, 1.170) | 1.133 (1.089, 1.179) | 0.487 |
| CS7 (P2.5_2d) | 1.132 (1.073, 1.195) | 1.146 (1.093, 1.201) | 0.690 |
| CS8 (P2.5_3d) | 1.136 (1.076, 1.199) | 1.139 (1.086, 1.195) | 0.590 |
| CS9 (P2.5_4d) | 1.143 (1.082, 1.206) | 1.139 (1.085, 1.196) | 0.533 |

CS data were natural-log-transformed after adding 1 (i.e., ln [x + 1]).

HR, hazard ratio; CI, confidence interval: CS, cold spell.

Adjusted for age, gender, marry, residence, education, region, BMI categories, sleep duration, drinking status, smoking status, heating fuels and cooking fuels.

P-value was calculated using interaction terms (cold spell×residence).
