# Supplementary material for: Association between cold spells and frailty among middle-aged and older adults in China: Evidence from a national longitudinal survey
Source: Research Square preprint supplement (doi:10.21203/rs.3.rs-8701131/v1), 2026-02-24
Supplement: Supplementary file 9 [file 8618e3314b68aa06331621ad.docx]

**Table S11** Association of cold spells with frailty by sleep duration

| **Exposure** | **HR (95%CI)**  **< 6h** | **HR (95%CI)**  **≥ 6h** | ***p-*value** |
| --- | --- | --- | --- |
| CS1 (P7.5_2d) | 1.134 (1.076, 1.197) | 1.148 (1.096, 1.203) | 0.643 |
| CS2 (P7.5_3d) | 1.136 (1.078, 1.197) | 1.153 (1.101, 1.207) | 0.610 |
| CS3 (P7.5_4d) | 1.13 (1.077, 1.186) | 1.144 (1.097, 1.192) | 0.677 |
| CS4 (P5_2d) | 1.119 (1.067, 1.174) | 1.139 (1.093, 1.186) | 0.699 |
| CS5 (P5_3d) | 1.113 (1.061, 1.167) | 1.131 (1.086, 1.177) | 0.791 |
| CS6 (P5_4d) | 1.118 (1.066, 1.173) | 1.133 (1.088, 1.181) | 0.845 |
| CS7 (P2.5_2d) | 1.149 (1.088, 1.213) | 1.140 (1.088, 1.194) | 0.618 |
| CS8 (P2.5_3d) | 1.146 (1.085, 1.210) | 1.139 (1.087, 1.193) | 0.623 |
| CS9 (P2.5_4d) | 1.157 (1.096, 1.222) | 1.138 (1.086, 1.192) | 0.426 |

CS data were natural-log-transformed after adding 1 (i.e., ln [x + 1]).

HR, hazard ratio; CI, confidence interval: CS, cold spell.

Adjusted for age, gender, marry, residence, education, region, BMI categories, sleep duration, drinking status, smoking status, heating fuels and cooking fuels.

P-value was calculated using interaction terms (cold spell×sleep duration).
