# Supplementary material for: Association between cold spells and frailty among middle-aged and older adults in China: Evidence from a national longitudinal survey
Source: Research Square preprint supplement (doi:10.21203/rs.3.rs-8701131/v1), 2026-02-24
Supplement: Supplementary file 10 [file 944ba2d99e4886b473f2e81f.docx]

**Table S5** Missing values for characteristic variables at the baseline

| **Variables** | **Missing number (%)** |
| --- | --- |
| Age | 0 (0) |
| Gender | 0 (0) |
| Marry | 2 (0.01) |
| Residence | 0 (0) |
| Education | 0 (0) |
| Region | 0 (0) |
| Sleep duration | 1,047 (7.71%) |
| Drinking status | 31 (0.23%) |
| Smoking status | 516 (3.80%) |
| BMI categories | 2,762 (20.30%) |
| Heating fuels | 2,481 (18.30%) |
| Cooking fuels | 186 (1.37%) |

BMI, body mass index.
