# Supplementary material for: Association between cold spells and frailty among middle-aged and older adults in China: Evidence from a national longitudinal survey
Source: Research Square preprint supplement (doi:10.21203/rs.3.rs-8701131/v1), 2026-02-24
Supplement: Supplementary file 11 [file a4f7bdb6b5f67497fe000b79.docx]

**Table S3** Description of variables and their transformations

| **Variable name** | **Type** | **Description** | **Convert** | **Conversion method** |
| --- | --- | --- | --- | --- |
| Cold spell | Continuous | Annual cold-spell days | Yes | ln (x + 1) |
| Age | Continuous | Age at baseline (years) | No | - |
| Gender | Categorical | Male vs. female | No | - |
| Marital status | Categorical | Married vs. unmarried | No | - |
| Residence | Categorical | Urban vs. rural registration | No | - |
| Education | Categorical | Level of formal education (Below primary, primary, middle, high+) | No | - |
| Region | Categorical | Administrative region of residence (South vs. North) | No | - |
| Sleep duration | Categorical | Self-reported nightly sleep hours (<6 h, ≥6 h) | No | - |
| Drinking status | Categorical | Never, former, or current alcohol drinker | No | - |
| Smoking status | Categorical | Never, former, or current smoker | No | - |
| BMI categories | Categorical | Body-mass-index groups (under-weight, normal, over-weight, obese) | No | - |
| Physical activity | Categorical | Weekly exercise level (low, moderate, high) | No | - |
| Socioeconomic status | Categorical | Wealth-based quintile (Poor, fair and good) | No | - |
| Heating fuels, | Categorical | Primary heating fuel type (clean vs. solid) | No | - |
| Cooking fuels, | Categorical | Primary cooking fuel type (clean vs. solid) | No | - |
| Frailty index | Continuous | Deficit-accumulation frailty score (0–100, higher = frailer) | No | - |

BMI, body-mass-index.
