# Supplementary material for: Association between cold spells and frailty among middle-aged and older adults in China: Evidence from a national longitudinal survey
Source: Research Square preprint supplement (doi:10.21203/rs.3.rs-8701131/v1), 2026-02-24
Supplement: Supplementary file 12 [file b0c910d9fd56362b176ea258.docx]

**Table S2.** The 32 items used to construct the frailty index

| **No** | **Categories** | **Description of the items** | **Cut-off value** |
| --- | --- | --- | --- |
| 1 | Chronic disease | Self-reported physician-diagnosed hypertension | Yes = 1, No = 0 |
| 2 | Self-reported physician-diagnosed diabetes | Yes = 1, No = 0 |
| 3 | Self-reported physician-diagnosed heart disease | Yes = 1, No = 0 |
| 4 | Self-reported physician-diagnosed stroke | Yes = 1, No = 0 |
| 5 | Self-reported physician-diagnosed cancer | Yes = 1, No = 0 |
| 6 | Self-reported physician-diagnosed arthritis | Yes = 1, No = 0 |
| 7 | Self-reported physician-diagnosed chronic lung disease | Yes = 1, No = 0 |
| 8 | Self-reported physician-diagnosed asthma | Yes = 1, No = 0 |
| 9 | Self-reported physician-diagnosed any emotional, nervous, or psychiatric problems | Yes = 1, No = 0 |
| 10 | Self-reported physician-diagnosed memory-related disease | Yes = 1, No = 0 |
| 11 | Self-reported vision problems | Yes = 1, No = 0 |
| 12 | Self-reported hearing problems | Yes = 1, No = 0 |
| 13 | Self-assessed health status | Self-reported general health status | Poor or fair = 1, excellent, very good, or good = 0 |
| 14 | Basic Activity of Daily Living | Difficulty with dressing | Yes = 1, No = 0 |
| 15 | Difficulty with bathing or showering | Yes = 1, No = 0 |
| 16 | Difficulty with eating | Yes = 1, No = 0 |
| 17 | Difficulty with getting in and out of bed | Yes = 1, No = 0 |
| 18 | Difficulty with using the toilet | Yes = 1, No = 0 |
| 19 | Instrumental Activities of Daily Living Scale | Difficulty with managing money | Yes = 1, No = 0 |
| 20 | Difficulty with taking medications | Yes = 1, No = 0 |
| 21 | Difficulty with shopping for groceries | Yes = 1, No = 0 |
| 22 | Difficulty with preparing meals | Yes = 1, No = 0 |
| 23 | Difficulty with doing housework | Yes = 1, No = 0 |
| 24 | Mobility Indicators | Difficulty with walking 100 yards | Yes = 1, No = 0 |
| 25 | Difficulty with getting up from a chair after sitting for long periods | Yes = 1, No = 0 |
| 26 | Difficulty with climbing several flights of stairs without resting | Yes = 1, No = 0 |
| 27 | Difficulty with lifting or carrying weights over 10 pounds | Yes = 1, No = 0 |
| 28 | Difficulty with picking up a coin from the table | Yes = 1, No = 0 |
| 29 | Difficulty with stooping, kneeling, or crouching | Yes = 1, No = 0 |
| 30 | Difficulty with reaching arms above shoulder level | Yes = 1, No = 0 |
| 31 | Depression | CESD-10 questionnaire | CESD-10 ≤10=0; >10 =1 |
| 32 | Cognition | (memory test score + orientation test score) / 14 | Continuous, ranging from 0 to 1 |

Depression is assessed using the Center for Epidemiologic Studies Depression Scale (CESD). In the CHARLS, the CESD-10 is utilized, and the total score spans from 0 to 30. The memory score represents the average number of words not recalled in both the immediate and delayed word recall tasks. This memory score ranges between 0 and 10. The orientation test consists of four inquiries regarding the day of the week, the month, the date of the month, and the year. One point is assigned for each incorrect answer, with a score range from 0 to 4.
