# Supplementary material for: Association between cold spells and frailty among middle-aged and older adults in China: Evidence from a national longitudinal survey
Source: Research Square preprint supplement (doi:10.21203/rs.3.rs-8701131/v1), 2026-02-24
Supplement: Supplementary file 13 [file c163e0964b6f1b55fa5371ac.docx]

**Table S17** Association of cold spell days (original scale) with frailty

| **Exposure** | **HR (95%CI) a** | **HR (95%CI) b** | **HR (95%CI) c** | **HR (95%CI) d** |
| --- | --- | --- | --- | --- |
| CS1 (P7.5_2d) | 1.003  (1.002, 1.004) | 1.005  (1.004, 1.006) | 1.006  (1.005, 1.007) | 1.006  (1.004, 1.007) |
| CS2 (P7.5_3d) | 1.003  (1.002, 1.004) | 1.005  (1.004, 1.006) | 1.006  (1.005, 1.008) | 1.006  (1.004, 1.007) |
| CS3 (P7.5_4d) | 1.003  (1.002, 1.004) | 1.005  (1.004, 1.006) | 1.006  (1.005, 1.008) | 1.006  (1.004, 1.007) |
| CS4 (P5_2d) | 1.003  (1.002, 1.004) | 1.005  (1.004, 1.007) | 1.007  (1.005, 1.008) | 1.006  (1.004, 1.007) |
| CS5 (P5_3d) | 1.003  (1.002, 1.005) | 1.006  (1.004, 1.007) | 1.007  (1.005, 1.008) | 1.006  (1.005, 1.008) |
| CS6 (P5_4d) | 1.004  (1.002, 1.005) | 1.006  (1.004, 1.007) | 1.007  (1.005, 1.008) | 1.006  (1.005, 1.008) |
| CS7 (P2.5_2d) | 1.004  (1.003, 1.005) | 1.006  (1.005, 1.008) | 1.007  (1.006, 1.009) | 1.007  (1.005, 1.008) |
| CS8 (P2.5_3d) | 1.004  (1.003, 1.005) | 1.006  (1.005, 1.008) | 1.007  (1.006, 1.009) | 1.007  (1.005, 1.008) |
| CS9 (P2.5_4d) | 1.004  (1.003, 1.005) | 1.006  (1.005, 1.008) | 1.008  (1.006, 1.009) | 1.007  (1.005, 1.008) |

HR, hazard ratio; CI, confidence interval: CS, cold spell.

a Model 1: unadjusted.

b Model 2: adjusted for age, gender, marry, residence, education and region.

c Model 3: adjusted for age, gender, marry, residence, education, region, BMI categories, sleep duration, drinking status, smoking status.

d Model 4: adjusted for age, gender, marry, residence, education, region, BMI categories, sleep duration, drinking status, smoking status, heating fuels and cooking fuels.
