# Supplementary material for: Association between cold spells and frailty among middle-aged and older adults in China: Evidence from a national longitudinal survey
Source: Research Square preprint supplement (doi:10.21203/rs.3.rs-8701131/v1), 2026-02-24
Supplement: Supplementary file 14 [file cb57476882f39ef6e1341bd8.docx]

**Table S15** Association of cold spells with frailty by region

| **Exposure** | **HR (95%CI)**  **South** | **HR (95%CI)**  **North** | ***p-*value** |
| --- | --- | --- | --- |
| CS1 (P7.5_2d) | 1.299 (1.029, 1.639) | 1.144 (1.104, 1.186) | 0.328 |
| CS2 (P7.5_3d) | 1.276 (0.922, 1.767) | 1.150 (1.110, 1.191) | 0.55 |
| CS3 (P7.5_4d) | 2.746 (1.693, 4.455) | 1.141 (1.105, 1.177) | **0.00358** |
| CS4 (P5_2d) | - | 1.135 (1.099, 1.171) | - |
| CS5 (P5_3d) | **-** | 1.127 (1.092, 1.163) | - |
| CS6 (P5_4d) | **-** | 1.131 (1.095, 1.168) | - |
| CS7 (P2.5_2d) | - | 1.145 (1.104, 1.187) | - |
| CS8 (P2.5_3d) | - | 1.141 (1.100, 1.183) | - |
| CS9 (P2.5_4d) | **-** | 1.144 (1.103, 1.187) | - |

CS data were natural-log-transformed after adding 1 (i.e., ln [x + 1]).

HR, hazard ratio; CI, confidence interval: CS, cold spell.

Adjusted for age, gender, marry, residence, education, region, BMI categories, sleep duration, drinking status, smoking status, heating fuels and cooking fuels.

P-value was calculated using interaction terms (cold spell×region).
