# Supplementary material for: Association between cold spells and frailty among middle-aged and older adults in China: Evidence from a national longitudinal survey
Source: Research Square preprint supplement (doi:10.21203/rs.3.rs-8701131/v1), 2026-02-24
Supplement: Supplementary file 15 [file e3e3217800baa2010e3d80c0.docx]

**Table S8** Association of cold spells with frailty by gender

| **Exposure** | **HR (95%CI)**  **Female** | **HR (95%CI)**  **Male** | ***p-*value** |
| --- | --- | --- | --- |
| CS1 (P7.5_2d) | 1.155 (1.106, 1.206) | 1.118 (1.053, 1.187) | 0.0571 |
| CS2 (P7.5_3d) | 1.159 (1.111, 1.21) | 1.119 (1.055, 1.188) | 0.0482 |
| CS3 (P7.5_4d) | 1.150 (1.106, 1.195) | 1.117 (1.059, 1.179) | 0.0589 |
| CS4 (P5_2d) | 1.141 (1.099, 1.186) | 1.107 (1.049, 1.169) | 0.0557 |
| CS5 (P5_3d) | 1.134 (1.092, 1.178) | 1.099 (1.042, 1.160) | 0.0534 |
| CS6 (P5_4d) | 1.137 (1.094, 1.182) | 1.104 (1.046, 1.166) | 0.0597 |
| CS7 (P2.5_2d) | 1.152 (1.103, 1.203) | 1.122 (1.056, 1.192) | 0.0636 |
| CS8 (P2.5_3d) | 1.149 (1.099, 1.200) | 1.120 (1.054, 1.191) | 0.0736 |
| CS9 (P2.5_4d) | 1.157 (1.107, 1.209) | 1.117 (1.05, 1.187) | **0.0437** |

CS data were natural-log-transformed after adding 1 (i.e., ln [x + 1]).

HR, hazard ratio; CI, confidence interval: CS, cold spell.

Adjusted for age, gender, marry, residence, education, region, BMI categories, sleep duration, drinking status, smoking status, heating fuels and cooking fuels.

P-value was calculated using interaction terms (cold spell×gender).
