# Supplementary material for: Association between cold spells and frailty among middle-aged and older adults in China: Evidence from a national longitudinal survey
Source: Research Square preprint supplement (doi:10.21203/rs.3.rs-8701131/v1), 2026-02-24
Supplement: Supplementary file 16 [file f98c42b7c55fedc241f9df67.docx]

**Table S1** Definition of cold spell

| **Definitions** | **Threshold (%)** | **Duration (days)** | **Intensity** |
| --- | --- | --- | --- |
| **Cold spell** |  |  |  |
| CS1 (P7.5_2d) | 7.5th | ≥ 2 | Light |
| CS2 (P7.5_3d) | 7.5th | ≥ 3 | Light |
| CS3 (P7.5_4d) | 7.5th | ≥ 4 | Light |
| CS4 (P5_2d) | 5th | ≥ 2 | Moderate |
| CS5 (P5_3d) | 5th | ≥ 3 | Moderate |
| CS6 (P5_4d) | 5th | ≥ 4 | Moderate |
| CS7 (P2.5_2d) | 2.5th | ≥ 2 | Severe |
| CS8 (P2.5_3d) | 2.5th | ≥ 3 | Severe |
| CS9 (P2.5_4d) | 2.5th | ≥ 4 | Severe |

CS, Cold spell.
